# Supplementary material for: Four novel nanometer-sized cobalt azametallacrown complexes
Source: Royal Society of Chemistry journal article supplement (doi:10.1039/b109517j), 2002-01-01
Supplement: b109517j_figs1.doc [file b109517j_figs1.doc]

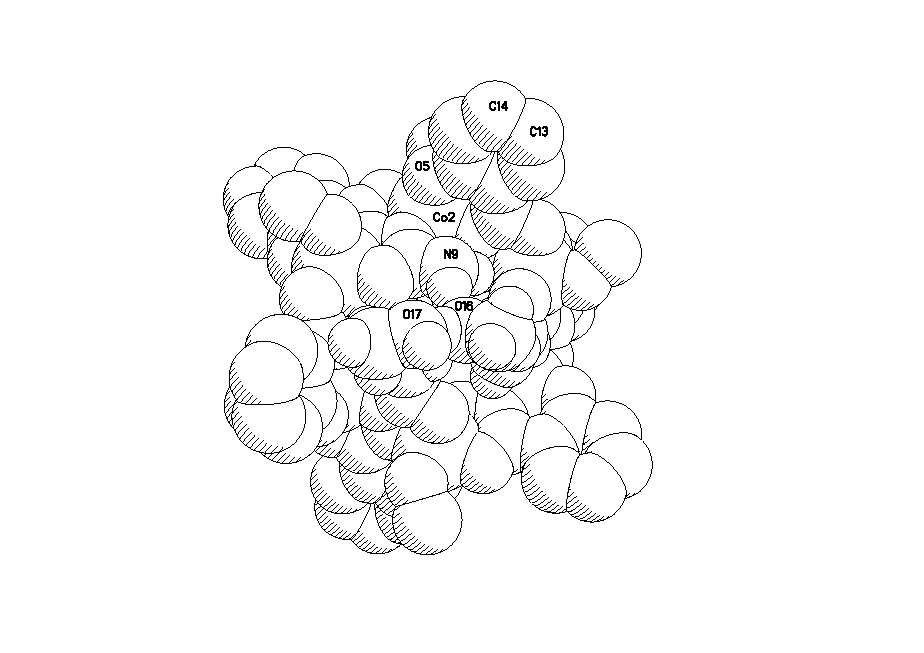


Fig. S1 Space filling of Co6(amshz)6(CH3OH)6]·10CH3OH·2H2O showing that there are two encapsulated solvent methanol molecules in the ‘host’ cavity of the azametallacrown molecule.
