# Supplementary material for: Four novel nanometer-sized cobalt azametallacrown complexes
Source: Royal Society of Chemistry journal article supplement (doi:10.1039/b109517j), 2002-01-01
Supplement: b109517j_figs2.doc [file b109517j_figs2.doc]

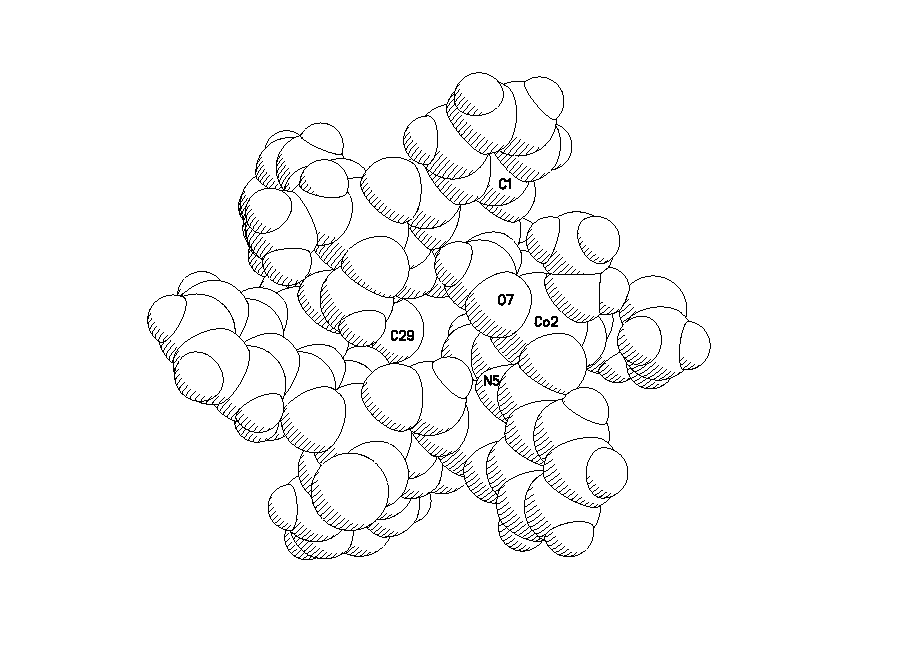


Fig. S2 Space filling of [Co6(ashz)6(CH3OH)6]·6CH3OH showing that there are no any guest molecules in the ‘host’ cavity of the azametallacrown molecule.
